# Supplementary material
Source: Elsevier journal article supplement (https://www.sciencedirect.com/science/article/pii/S2173572717301431)
Supplement: mmc2 [file S2173572717301431:mmc2.pdf]

|                | <i>muestra de pacientes</i> | <i>seguimiento de los pacientes</i> | <i>resultado evaluado</i> | <i>variable que marca el pronóstico</i> | <i>análisis de los datos</i> | <i>tratamiento subsiguiente a la inclusión en la cohorte</i> | <i>COMENTARIOS</i>                                                                                                                   |
|----------------|-----------------------------|-------------------------------------|---------------------------|-----------------------------------------|------------------------------|--------------------------------------------------------------|--------------------------------------------------------------------------------------------------------------------------------------|
| Mecher (20)    |                             | ?                                   |                           |                                         | ?                            |                                                              | El muestreo fue por conveniencia, poco tiempo de seguimiento, no tuvo ajuste estadístico para otros factores pronósticos importantes |
| Bakker (21)    |                             | ?                                   |                           |                                         |                              |                                                              | El muestreo fue por conveniencia, poco tiempo de seguimiento                                                                         |
| Valle (22)     |                             |                                     |                           |                                         | ?                            |                                                              | El muestreo fue por conveniencia, no tuvo ajuste estadístico para otros factores pronósticos importantes                             |
| Troskot (23)   |                             |                                     |                           |                                         |                              |                                                              | El muestreo fue por conveniencia                                                                                                     |
| Van Beest (24) |                             |                                     |                           |                                         |                              |                                                              | El muestreo fue por conveniencia                                                                                                     |
| Ospina (25)    |                             |                                     |                           |                                         | ?                            |                                                              | El muestreo fue por conveniencia, no tuvo ajuste estadístico para otros factores pronósticos importantes                             |
| Du (26)        |                             |                                     |                           |                                         | ?                            |                                                              | El muestreo fue por conveniencia, no tuvo ajuste estadístico para otros factores pronósticos importantes                             |
| Zhao (27)      |                             |                                     |                           |                                         | ?                            |                                                              | El muestreo fue por conveniencia, no tuvo ajuste estadístico para otros factores pronósticos importantes                             |
| Zhang (28)     |                             | ?                                   |                           |                                         | ?                            |                                                              | El muestreo fue por conveniencia, poco tiempo de seguimiento, no tuvo ajuste estadístico para otros factores pronósticos importantes |
| Mallat (29)    |                             | ?                                   |                           |                                         | ?                            |                                                              | El muestreo fue por conveniencia, poco tiempo de seguimiento, no tuvo ajuste estadístico para otros factores pronósticos importantes |
| Mallat (30)    |                             |                                     |                           |                                         | ?                            |                                                              | El muestreo fue por conveniencia, no tuvo ajuste estadístico para otros factores pronósticos importantes                             |
| Ospina (31)    |                             |                                     |                           |                                         |                              |                                                              | El muestreo fue por conveniencia                                                                                                     |

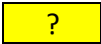

Riesgo no claro

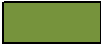

Bajo riesgo de sesgos

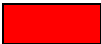

Alto riesgo de sesgo
